# Supplementary material for: Electrochemical formation and dissolution of an iodine–halide coordination solid complex in a nano-confined space
Source: Royal Society of Chemistry journal article supplement (doi:10.1039/d1ta03554a), 2021-01-01
Supplement: d1ta03554a1.pdf [file d1ta03554a1.pdf]

## Supporting Information

### **Electrochemical formation and dissolution of an Iodine-Halide coordination solid complex in a nano-confined space**

*Jaehyun Jeon,<sup>a</sup> Jiseon Hwang,<sup>a,b</sup> Jung Hoon Yang,<sup>c</sup> Jinho Chang<sup>\*a,d</sup>*

<sup>a</sup>Department of Chemistry and Research Institute for Convergence of Basic Science, Hanyang University, Seoul 04763, Republic of Korea

<sup>b</sup>Current address: Department of Chemistry and Biochemistry, Ohio State University, Columbus, Ohio 43210 USA

<sup>c</sup>Korea Institute of Energy Research (KIER), Daejeon 34129, Republic of Korea

<sup>d</sup>Department of HY-KIST Bio-convergence, Hanyang University, Seoul 04763, Republic of Korea

## Contents

|                                                                                                                                                                                                                                                                                                                                                                                                              |      |
|--------------------------------------------------------------------------------------------------------------------------------------------------------------------------------------------------------------------------------------------------------------------------------------------------------------------------------------------------------------------------------------------------------------|------|
| Detailed description for equation 4                                                                                                                                                                                                                                                                                                                                                                          | S-5  |
| Estimation of the specific cell capacitance ( $SC_{\text{cell}}$ ), energy density (ED), and power density (PD) in (-)micro-C NaI(aq) with/without NaBr(aq) micro-C(+)                                                                                                                                                                                                                                       | S-6  |
| Estimation of $C_{\text{ZIRB}}$ from (-)Zn 0.2 M ZnSO <sub>4</sub> + 10 mM NaI with/without 5 mM NaBr micro-C(+)                                                                                                                                                                                                                                                                                             | S-6  |
| Fig. S1                                                                                                                                                                                                                                                                                                                                                                                                      | S-7  |
| FE-SEM images of (a) micro-C and (b) PG, (c) N <sub>2</sub> ADS and DES and (d) the corresponding pore size distribution in micro-C.                                                                                                                                                                                                                                                                         |      |
| Fig. S2                                                                                                                                                                                                                                                                                                                                                                                                      | S-8  |
| Potential vs. pH for iodine/H <sub>2</sub> O system in an aqueous solution at 25 °C. Reprinted from Frackowiak et al. <sup>[2]</sup> Copyright (2014) with permission from Elsevier.                                                                                                                                                                                                                         |      |
| Fig. S3                                                                                                                                                                                                                                                                                                                                                                                                      | S-9  |
| CVs from (a) (-)micro-C 0.1 M NaI PG(+) and (b) (-)micro-C 0.05 M NaBr PG(+) at 2 mV/s.                                                                                                                                                                                                                                                                                                                      |      |
| Fig. S4                                                                                                                                                                                                                                                                                                                                                                                                      | S-10 |
| The integrated area to estimate $Q_{\text{Ox}}$ and $Q_{\text{Red}}$ from CVs on a micro-C measured in (-)micro-C 0.1 M NaI(aq) (a) without/(b) with 0.05 M NaBr(aq) micro-C(+), respectively.                                                                                                                                                                                                               |      |
| Fig. S5                                                                                                                                                                                                                                                                                                                                                                                                      | S-11 |
| 2D axial symmetric domain of the simulation for the theoretical model.                                                                                                                                                                                                                                                                                                                                       |      |
| Fig. S6                                                                                                                                                                                                                                                                                                                                                                                                      | S-12 |
| (a, c) Simulated steady-state voltammograms associated with electro-oxidation of I <sup>-</sup> in a solution containing (a) I <sup>-</sup> only, and (c) I <sup>-</sup> and Br <sup>-</sup> . (b, d) Corresponding concentration profiles of each species vs. $\eta$ at the electrode surface in the voltammogram from a solution with (b) I <sup>-</sup> only and (d) I <sup>-</sup> and Br <sup>-</sup> . |      |
| Fig. S7                                                                                                                                                                                                                                                                                                                                                                                                      | S-13 |
| The reproducibility test of $E_{\text{cell}}$ (black), $E_+$ (red), and $E_-$ (blue)-profiles vs. $t$ at 0.5 A g <sup>-1</sup> from (a) (-)micro-C 0.5 M NaI micro-C(+) and (b) (-)micro-C 0.5 M NaI + 0.4 M NaBr micro-C(+).                                                                                                                                                                                |      |
| Fig. S8                                                                                                                                                                                                                                                                                                                                                                                                      | S-14 |
| $E_{\text{cell}}$ (black), $E_+$ (red), and $E_-$ (blue)-profiles as a function of $t$ at constantly applied 0.5 A g <sup>-1</sup> to the two electrochemical cells configured as (a) micro-C 0.5 M NaI PG and (b) micro-C 0.5 M NaI + 0.4 M NaBr PG, respectively.                                                                                                                                          |      |
| Fig. S9                                                                                                                                                                                                                                                                                                                                                                                                      | S-15 |

(a) The charge/discharge profiles vs.  $t$  and (b)  $SC_{\text{cell}}$  at  $0.5 \text{ A g}^{-1}$  from the symmetric cells containing  $0.5 \text{ M NaI}$  with different concentration of  $\text{Br}^-$ .

**Fig. S10** .....S-16

$E_{\text{cell}}$  vs.  $t$  curves at different current densities from (-)micro-C| $0.5 \text{ M NaI}$ |micro-C(+) (black), (-)micro-C| $0.5 \text{ M NaI} + 0.4 \text{ M NaBr}$ |micro-C(+) (blue), and (-)micro-C| $0.5 \text{ M NaI} + 0.4 \text{ M NaNO}_3$ |micro-C(+) (red).

**Fig. S11** .....S-17

Cycle stability of (-)micro-C| $0.5 \text{ M NaI} + 0.4 \text{ M NaBr}$ |micro-C(+) at  $4 \text{ A g}^{-1}$ .

**Fig. S12** .....S-18

Deconvoluted high-resolution Na 2s XPS spectrum from micro-C serving as the positive electrode after charging to  $E_{\text{cell}} = 1.3 \text{ V}$  at  $0.5 \text{ A g}^{-1}$  from (-)micro-C| $0.5 \text{ M NaI}$ |micro-C(+).

**Fig. S13** .....S-19

SEM images and corresponding EDS elemental mapping from micro-C serving as positive electrodes in (-)micro-C| $0.5 \text{ M NaI}$ |micro-C(+) cell after charging to  $E_{\text{cell}} = 1.3 \text{ V}$ . The micro-C were analyzed after rinsing with DI water.

**Fig. S14** .....S-20

(a) Raman spectra and (b) a deconvoluted high-resolution I 3d XPS spectrum from micro-C serving as positive electrodes after charging to  $E_{\text{cell}} = 1.3 \text{ V}$  at  $0.5 \text{ A g}^{-1}$  from (-)micro-C| $0.5 \text{ M NaI} + 0.4 \text{ M NaBr}$ |micro-C(+).

**Fig. S15** .....S-21

The SEM images and corresponding EDS elemental mapping from micro-C serving as positive electrodes in (-)micro-C| $0.5 \text{ M NaI}$  with  $0.4 \text{ M NaBr}$ |micro-C(+) cell after charging at  $0.5 \text{ A g}^{-1}$  to  $E_{\text{cell}} = 1.3 \text{ V}$ . The micro-C were analyzed after rinsing with DI water.

**Fig. S16** .....S-22

$E_{\text{cell}}$  vs.  $t$  curves in the ZIRB containing  $10 \text{ mM NaI}$  with (red)/ without (black)  $5 \text{ mM NaBr}$  at (a)  $0.3 \text{ A g}^{-1}$  and (b)  $0.015 \text{ A g}^{-1}$ .

**Fig. S17** .....S-23

The reproducibility test of  $E_{\text{cell}}$  vs.  $C_{\text{ZIRB}}$  curves in a model ZIRB containing  $10 \text{ mM NaI}$  with (red)/without (black)  $5 \text{ mM NaBr}$  at (a)  $0.3 \text{ A g}^{-1}$  and (b)  $0.015 \text{ A g}^{-1}$ .

**Fig. S18** .....S-24

$E_{\text{cell}}$  vs.  $C_{\text{ZIRB}}$  curves in model ZIRBs at various current densities from (-)Zn| $0.2 \text{ M ZnSO}_4(\text{aq}) + 10 \text{ mM NaI}(\text{aq})$  |micro-C(+) (black), (-)Zn| $0.2 \text{ M ZnSO}_4(\text{aq}) + 10 \text{ mM NaI}(\text{aq}) + 5 \text{ mM NaBr}(\text{aq})$ |micro-C(+) (blue), and (-)Zn| $0.2 \text{ M ZnSO}_4(\text{aq}) + 10 \text{ mM NaI}(\text{aq}) + 5 \text{ mM NaNO}_3(\text{aq})$ |micro-C(+) (red), respectively.

|                                                                                                                                                                                                                                  |      |
|----------------------------------------------------------------------------------------------------------------------------------------------------------------------------------------------------------------------------------|------|
| <b>Table S1.</b> .....                                                                                                                                                                                                           | S-25 |
| Reactions and corresponding parameters for a simulation without Br <sup>-</sup> , with results displayed as simulated voltammograms and corresponding concentration profiles in Figure 2b-c and Figure S6a-b, respectively.      |      |
| <b>Table S2.</b> .....                                                                                                                                                                                                           | S-26 |
| Reactions and corresponding parameters for a simulation with Br <sup>-</sup> , with results are displayed as simulated voltammograms and the corresponding concentration profiles in Figure 2d-e and Figure S6c-d, respectively. |      |
| <b>Table S3.</b> .....                                                                                                                                                                                                           | S-28 |
| ED at a specific PD from the electrochemical capacitors operated in an aqueous solution with various redox active species.                                                                                                       |      |
| <b>Abbreviations</b> .....                                                                                                                                                                                                       | S-29 |
| <b>References</b> .....                                                                                                                                                                                                          | S-31 |

#### Detailed description for equation 4

For the  $I_2(aq)_{bulk}/I^-(aq)$  redox reaction in reaction S1, the half-redox potential,  $E_{I_2(aq)_{bulk}/I^-(aq)}$  can be expressed as a Nernst equation:

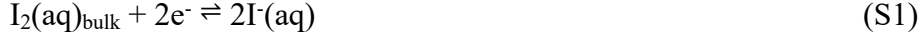

$$E_{I_2(aq)_{bulk}/I^-(aq)} = E_{I_2(aq)_{bulk}/I^-(aq)}^\circ - \frac{RT}{n_e F} \ln \left( \frac{C_{I^-(aq)}^2}{C_{I_2(aq)_{bulk}}} \right) \quad (S2)$$

where  $n_e$  is the number of electrons in the redox reaction, which is 2. The half-redox potential of the  $I_2(aq)_{pore}/I^-(aq)$  redox reaction (reaction S3),  $E_{I_2(aq)_{pore}/I^-(aq)}$ , can also be expressed as:

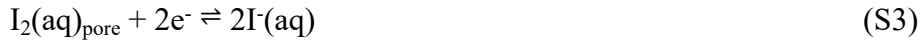

$$E_{I_2(aq)_{pore}/I^-(aq)} = E_{I_2(aq)_{pore}/I^-(aq)}^\circ - \frac{RT}{2F} \ln \left( \frac{C_{I^-(aq)}^2}{C_{I_2(aq)_{pore}}} \right) \quad (S4)$$

At equilibrium,  $E_{I_2(aq)_{bulk}/I^-(aq)}$  is the same as  $E_{I_2(aq)_{pore}/I^-(aq)}$ . Therefore, the difference between the two half-redox potentials,  $\Delta E$ , can be expressed as:

$$\Delta E = \left\{ E_{I_2(aq)_{bulk}/I^-(aq)}^\circ - E_{I_2(aq)_{pore}/I^-(aq)}^\circ \right\} - \frac{RT}{2F} \ln \left( \frac{C_{I_2(aq)_{pore}}}{C_{I_2(aq)_{bulk}}} \right) \quad (S5)$$

Because  $C_{I_2(aq)_{pore}}/C_{I_2(aq)_{bulk}}$  at equilibrium is  $K_{stab}$ , we can derive equation 4 in the article from equation S5.

**Estimation of specific cell capacitance ( $SC_{cell}$ ), energy density (ED), and power density (PD) in (-)micro-C|NaI(aq) with/without NaBr(aq)|micro-C(+)**

In micro-C|NaI(aq) with/without NaBr(aq)|micro-C,  $SC_{cell}$  ( $F\ g^{-1}$ ) was estimated from charge/discharge curves using equation S6:<sup>[1]</sup>

$$SC_{spec, cell} = i \cdot \Delta t / (\Delta V \cdot m) \quad (S6)$$

where  $\Delta V$  is the driven cell potential,  $i$  is the applied current at charge and discharge,  $\Delta t$  is the time during charge and discharge, and  $m$  is the mass of the total micro-C in both the positive and negative electrodes of the symmetric cell.

The  $ED$  (Wh/kg) and  $PD$  (W/kg) of the cell were estimated from discharge curves using:<sup>[2]</sup>

$$ED = \frac{1}{2} SC_{cell} \Delta V^2 \quad (S7)$$

$$PD = ED / \Delta t \quad (S8)$$

**Estimation of  $C_{ZIRB}$  from (-)Zn|0.2 M ZnSO<sub>4</sub> + 10 mM NaI with/without 5 mM NaBr|micro-C(+)**

The  $E_{cell}$  vs. capacity curves in Figure 4 were obtained from the  $E_{cell}$  vs.  $t$  curves at constantly applied currents in Figure S11, and the specific capacity of the corresponding electrochemical cells was estimated by:

$$C_{ZIRB} = i \cdot \Delta t / m \quad (S9)$$

where  $m$  is the mass of micro-C in the cell.

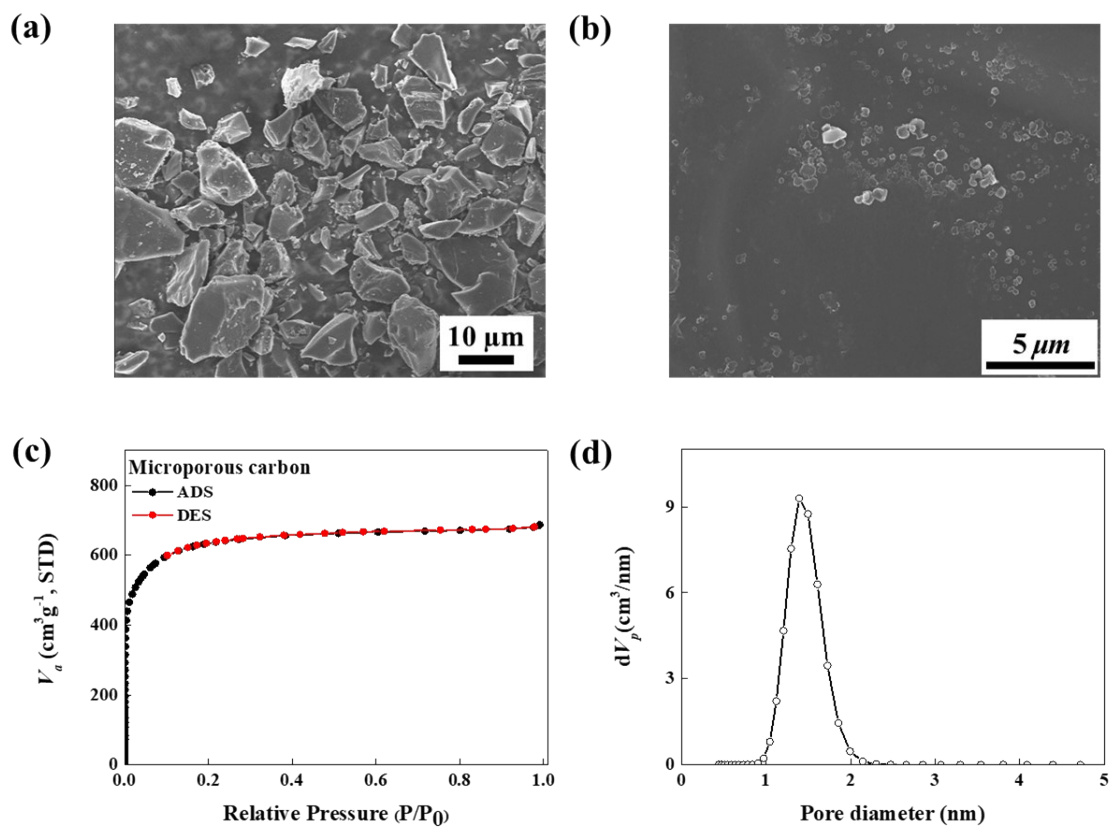

**Fig. S1** The FE-SEM images of (a) micro-C and (b) PG, (c) N<sub>2</sub> ADS and DES and (d) the corresponding pore-size distribution in micro-C.

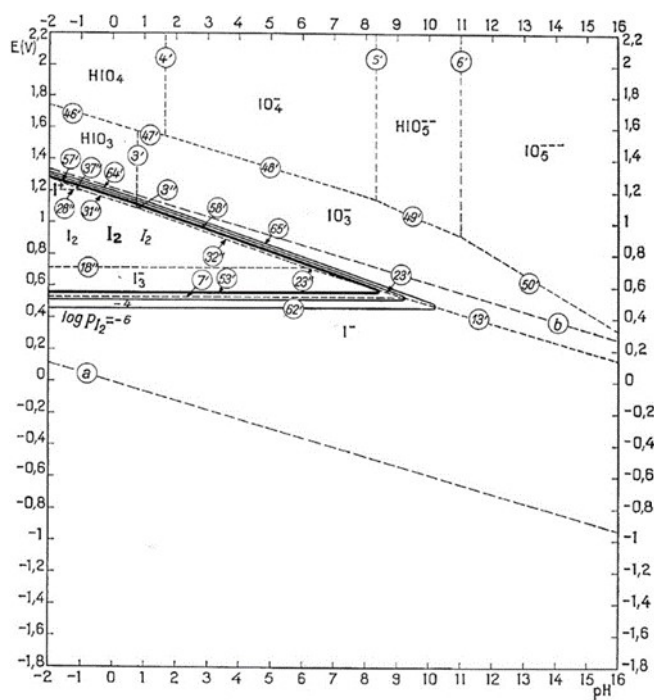

**Fig. S2** Potential vs. pH for an iodine/H<sub>2</sub>O system in an aqueous solution at 25 °C. Reprinted from Frackowiak et al.<sup>[2]</sup> Copyright (2014) with permission from Elsevier.



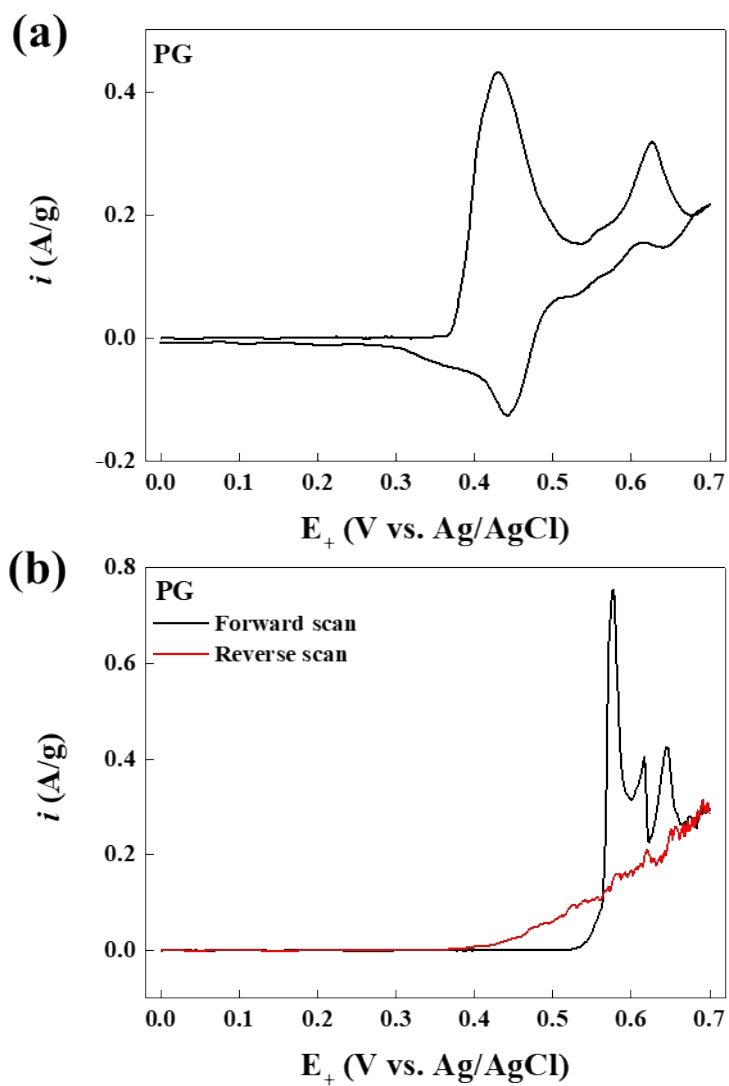

**Fig. S3** CVs from (a) (-)micro-C|0.1 M NaCl|PG(+) and (b) (-)micro-C|0.05 M NaBr|PG(+) at 2 mV s<sup>-1</sup>.

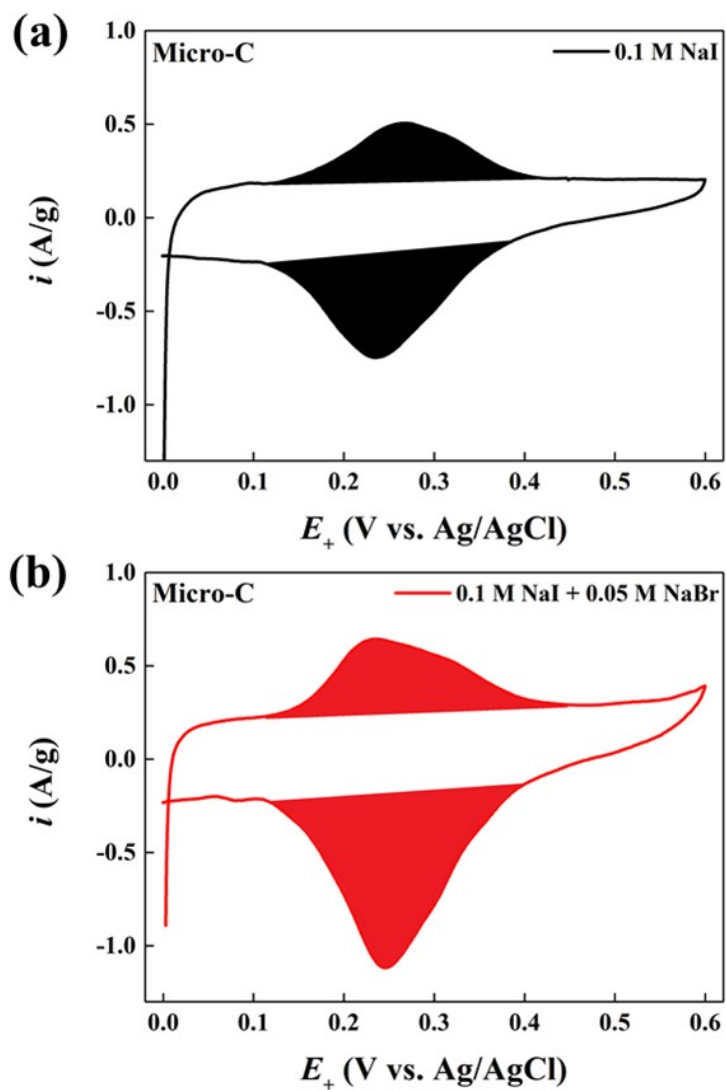

**Fig. S4** The integrated area to estimate  $Q_{\text{Ox}}$  and  $Q_{\text{Red}}$  from CVs on a micro-C measured in (-)micro-C|0.1 M NaI(aq) (a) without/(b) with 0.05 M NaBr(aq)|micro-C(+), respectively.

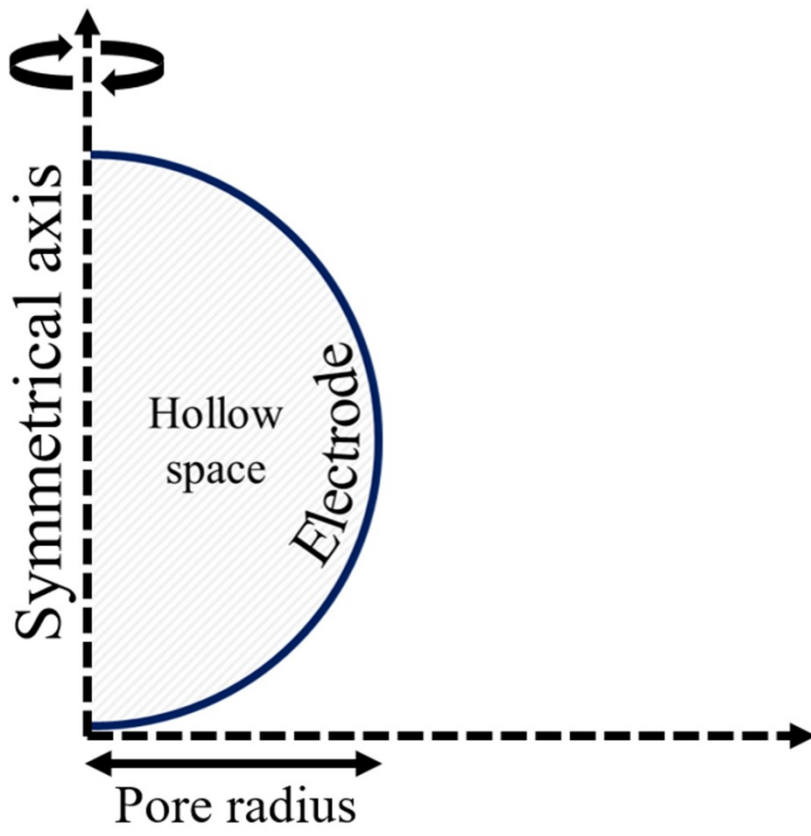

Fig. S5 2D axial symmetric domain of the simulation for the theoretical model.

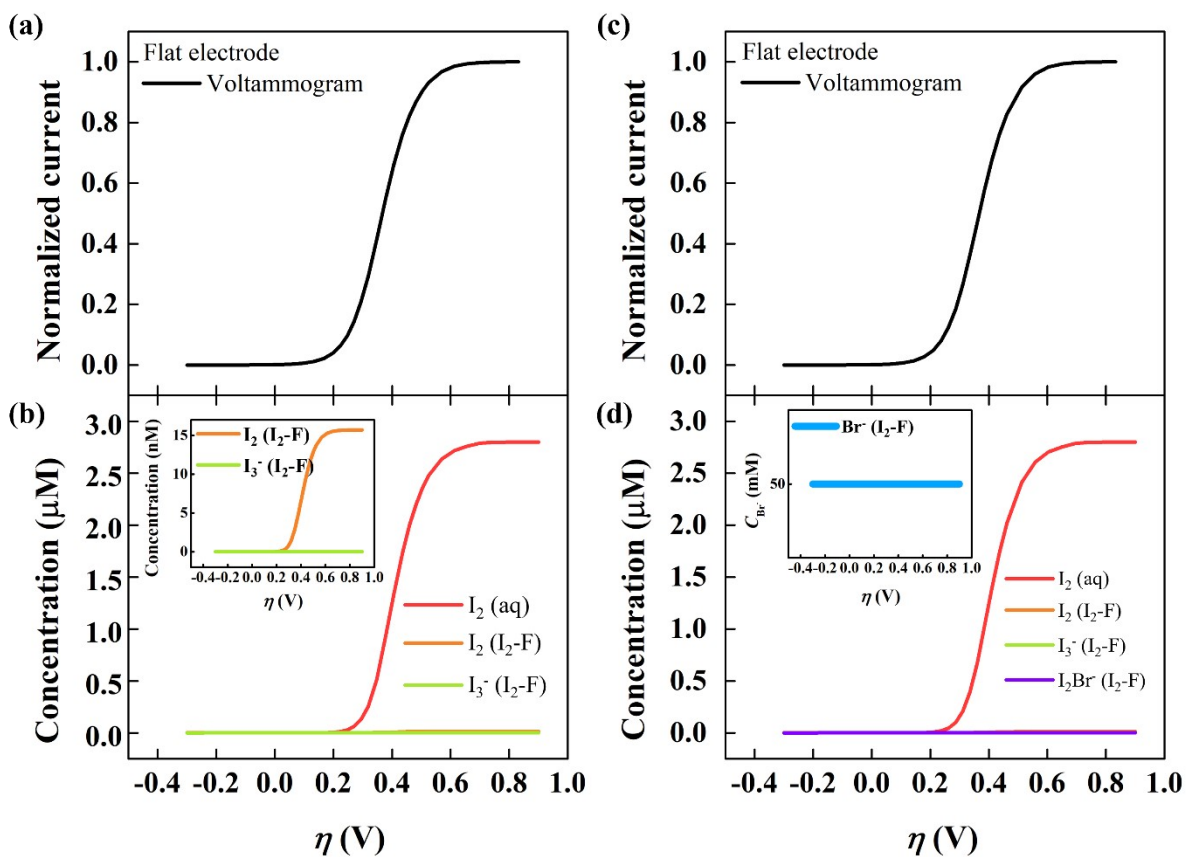

**Fig. S6** (a, c) Simulated steady-state voltammograms associated with electro-oxidation of  $\text{I}^-$  in a solution containing (a)  $\text{I}^-$  only, and (c)  $\text{I}^-$  and  $\text{Br}^-$ . (b, d) Corresponding concentration profiles of each species vs.  $\eta$  at the electrode surface in the voltammogram from a solution with (b)  $\text{I}^-$  only and (d)  $\text{I}^-$  and  $\text{Br}^-$ .

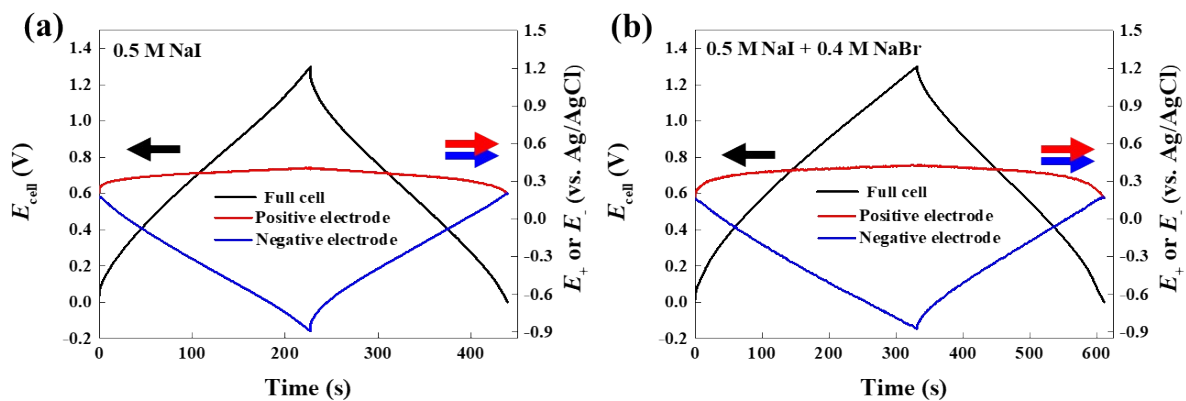

**Fig. S7** The reproducibility test of  $E_{\text{cell}}$  (black),  $E_+$  (red), and  $E_-$  (blue)-profiles vs.  $t$  at  $0.5 \text{ A g}^{-1}$  from (a) (-)micro-C|0.5 M NaI|micro-C(+) and (b) (-)micro-C|0.5 M NaI + 0.4 M NaBr|micro-C(+).

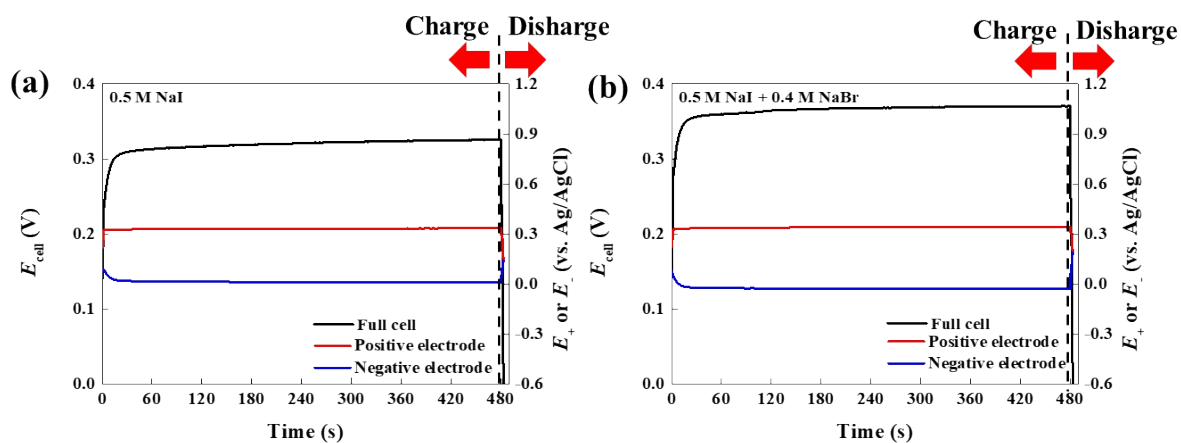

**Fig. S8**  $E_{\text{cell}}$  (black),  $E_+$  (red), and  $E_-$  (blue)-profiles as a function of  $t$  at constantly applied  $0.5 \text{ A g}^{-1}$  to the two electrochemical cells configured as (a) micro-C|0.5 M NaI|PG and (b) micro-C|0.5 M NaI + 0.4 M NaBr|PG, respectively.

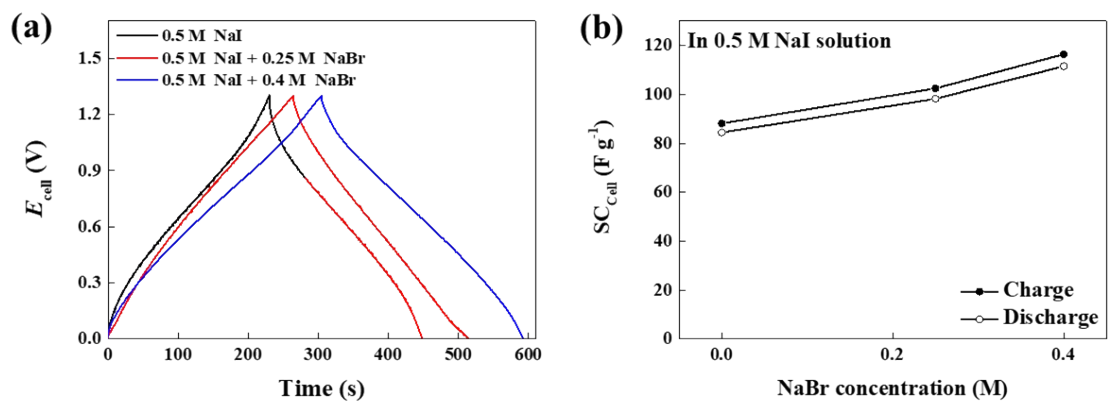

**Fig. S9** (a) The charge/discharge profiles vs.  $t$  and (b)  $SC_{\text{cell}}$  at  $0.5 \text{ A g}^{-1}$  from the symmetric cells containing  $0.5 \text{ M NaI}$  with different concentration of  $\text{Br}^-$ .

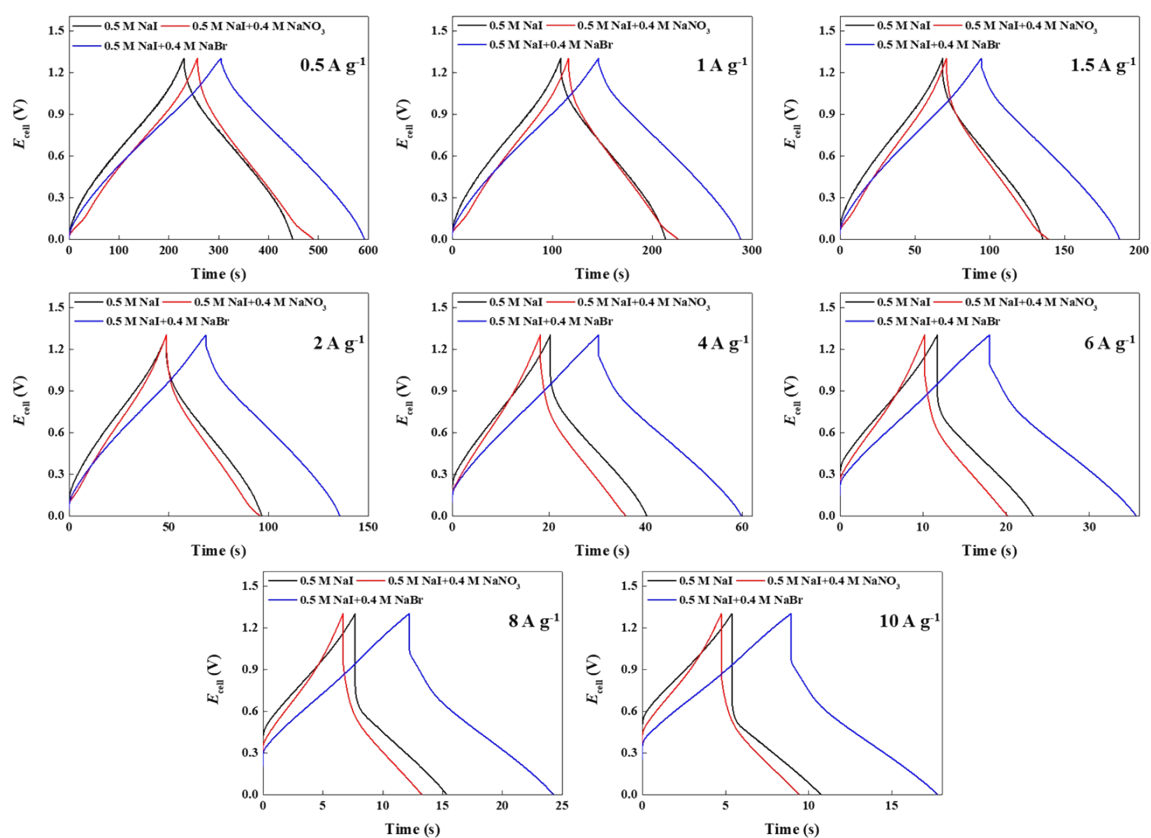

**Fig. S10**  $E_{\text{cell}}$  vs.  $t$  curves at different current densities from (-)micro-C|0.5 M NaI|micro-C(+) (black), (-)micro-C|0.5 M NaI + 0.4 M NaBr|micro-C(+) (blue), and (-)micro-C|0.5 M NaI + 0.4 M NaNO<sub>3</sub>|micro-C(+) (red).



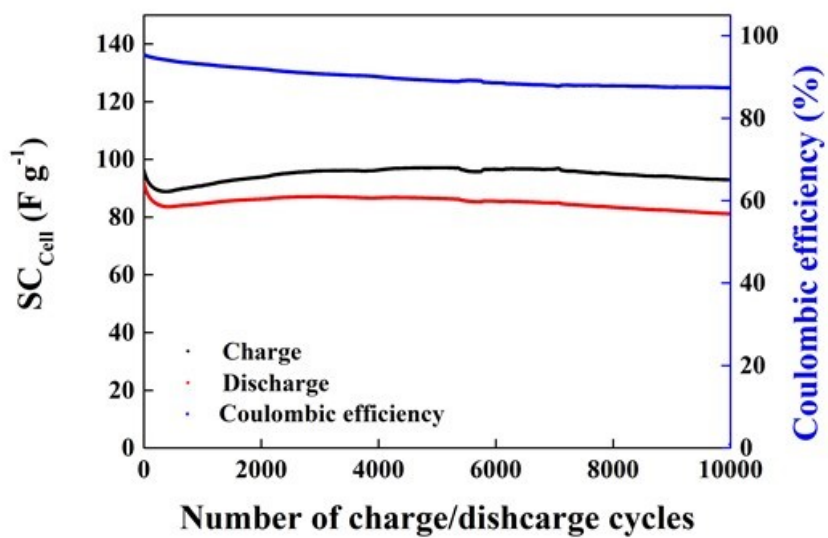

**Fig. S11** Cycle stability of (-)micro-C|0.5 M NaI + 0.4 M NaBr|micro-C(+) at 4 A g<sup>-1</sup>.

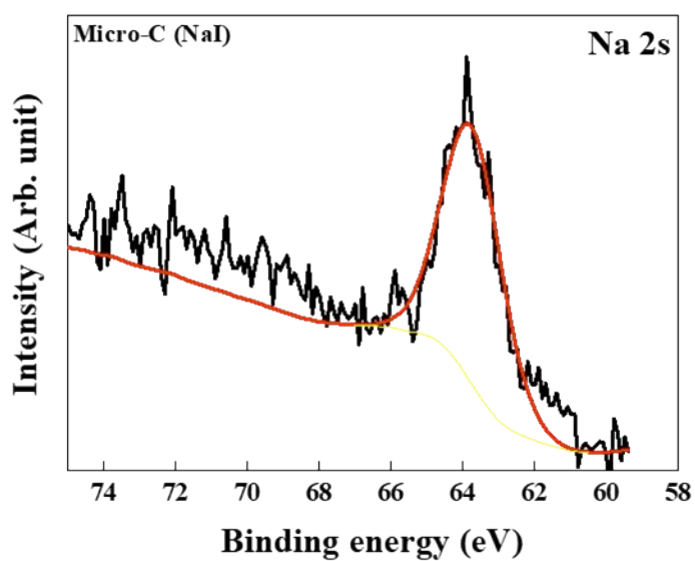

**Fig. S12** Deconvoluted high-resolution Na 2s XPS spectrum from micro-C serving as the positive electrode after charging to  $E_{\text{cell}} = 1.3$  V at  $0.5 \text{ A g}^{-1}$  from (-)micro-C|0.5 M NaI|micro-C(+).

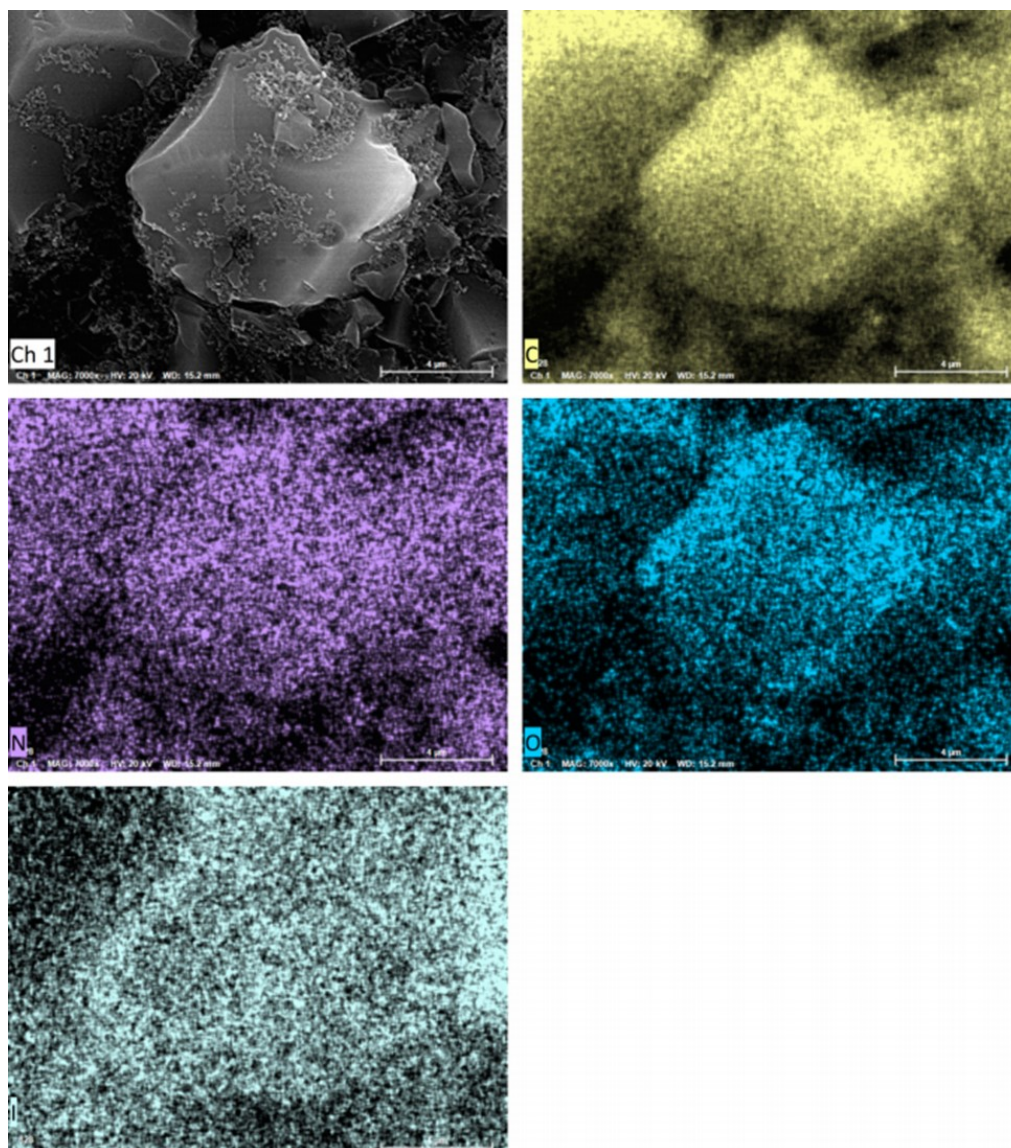

| Element | At. No. | Netto      | Mass [%]     | Mass Norm. [%] | Atom [%]      | abs. error [%] (3 sigma) | rel. error [%] (3 sigma) |
|---------|---------|------------|--------------|----------------|---------------|--------------------------|--------------------------|
| C       | 6       | 1120130    | 62.54        | 63.08          | 84.33         | 19.57                    | 31.29                    |
| N       | 7       | 31650      | 8.79         | 8.87           | 10.17         | 3.31                     | 37.62                    |
| O       | 8       | 21097      | 2.21         | 2.23           | 2.24          | 0.96                     | 43.46                    |
| I       | 53      | 979952     | 25.61        | 25.83          | 3.27          | 2.24                     | 8.75                     |
|         |         | <b>Sum</b> | <b>99.15</b> | <b>100.00</b>  | <b>100.00</b> |                          |                          |

**Fig. S13** SEM images and corresponding EDS elemental mapping from micro-C serving as positive electrodes in (-)micro-C|0.5 M NaI|micro-C(+) cell after charging to  $E_{\text{cell}} = 1.3$  V.

The micro-C were analyzed after rinsing with DI water.

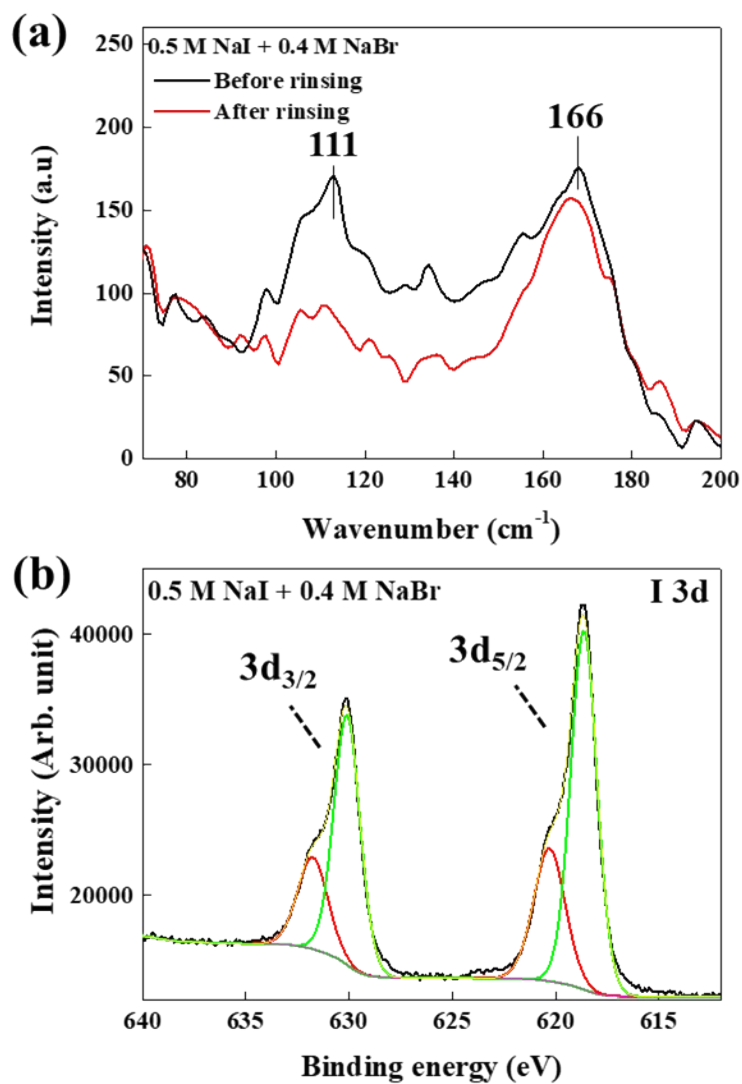

**Fig. S14** (a) Raman spectra and (b) a deconvoluted high-resolution I 3d XPS spectrum from micro-C serving as positive electrodes after charging to  $E_{\text{cell}} = 1.3 \text{ V}$  at  $0.5 \text{ A g}^{-1}$  from (-)micro-C|0.5 M NaI + 0.4 M NaBr|micro-C(+).

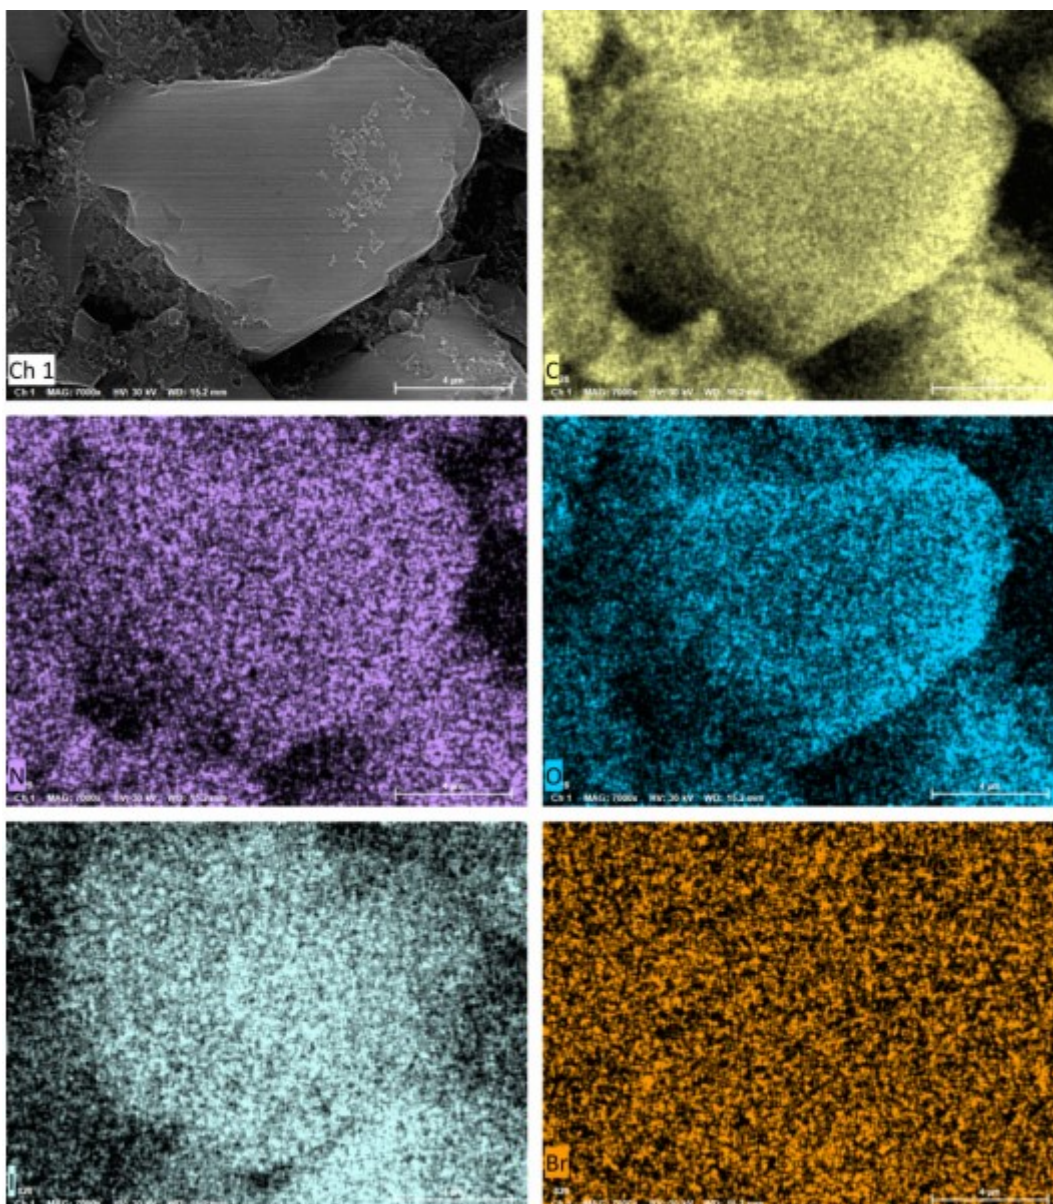

Map

| Element | At. No. | Netto      | Mass [%]     | Mass Norm. [%] | Atom [%]      | abs. error [%] (3 sigma) | rel. error [%] (3 sigma) |
|---------|---------|------------|--------------|----------------|---------------|--------------------------|--------------------------|
| C       | 6       | 1197266    | 54.29        | 55.10          | 82.14         | 16.98                    | 31.27                    |
| N       | 7       | 45228      | 8.29         | 8.41           | 10.75         | 3.03                     | 36.60                    |
| O       | 8       | 27711      | 1.98         | 2.01           | 2.25          | 0.86                     | 43.25                    |
| I       | 53      | 4634944    | 33.97        | 34.47          | 4.86          | 2.94                     | 8.65                     |
| Br      | 35      | 0          | 0.00         | 0.00           | 0.00          | 0.00                     | 1.33                     |
|         |         | <b>Sum</b> | <b>98.52</b> | <b>100.00</b>  | <b>100.00</b> |                          |                          |

**Fig. S15** The SEM images and corresponding EDS elemental mapping from micro-C serving as positive electrodes in (-)micro-C|0.5 M NaI with 0.4 M NaBr|micro-C(+) cell after charging at 0.5 A g<sup>-1</sup> to  $E_{\text{cell}} = 1.3$  V. The micro-C were analyzed after rinsing with DI water.

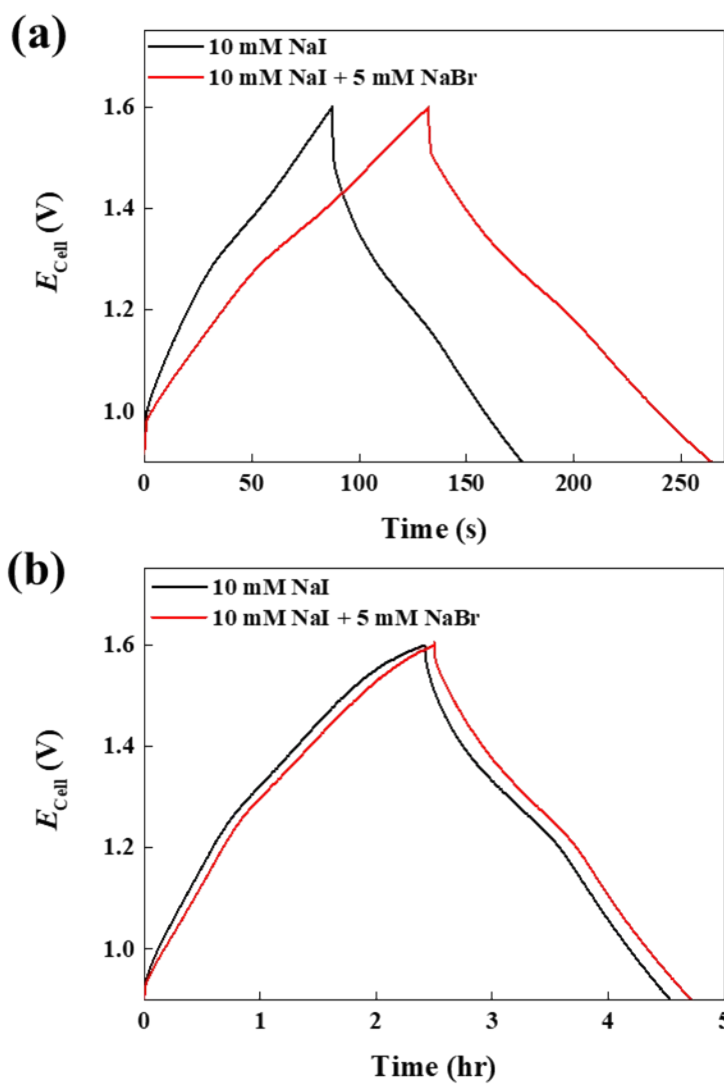

**Fig. S16**  $E_{\text{cell}}$  vs.  $t$  curves in the ZIRB containing 10 mM NaI with (red)/ without (black) 5mM NaBr at (a)  $0.3 \text{ A g}^{-1}$  and (b)  $0.015 \text{ A g}^{-1}$ .

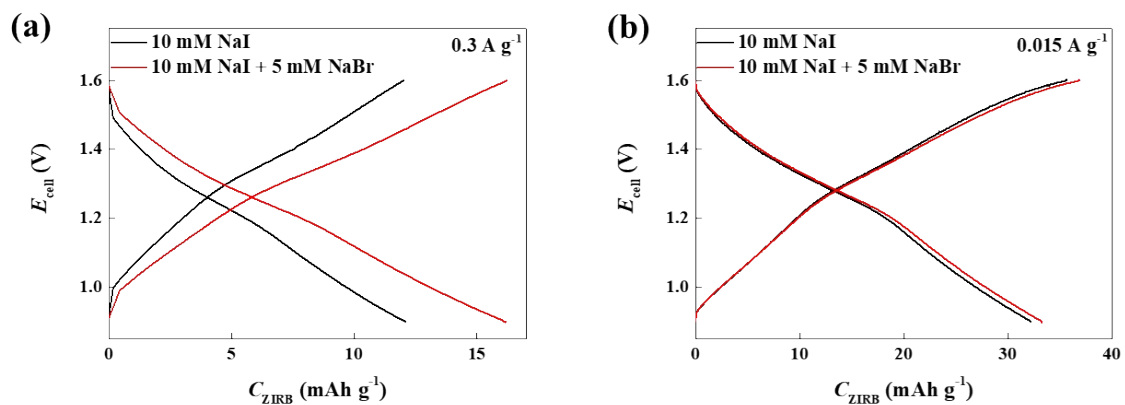

**Fig. S17** The reproducibility test of  $E_{\text{cell}}$  vs.  $C_{\text{ZIRB}}$  curves in a model ZIRB containing 10 mM NaI with (red)/without (black) 5 mM NaBr at (a)  $0.3 \text{ A g}^{-1}$  and (b)  $0.015 \text{ A g}^{-1}$ .

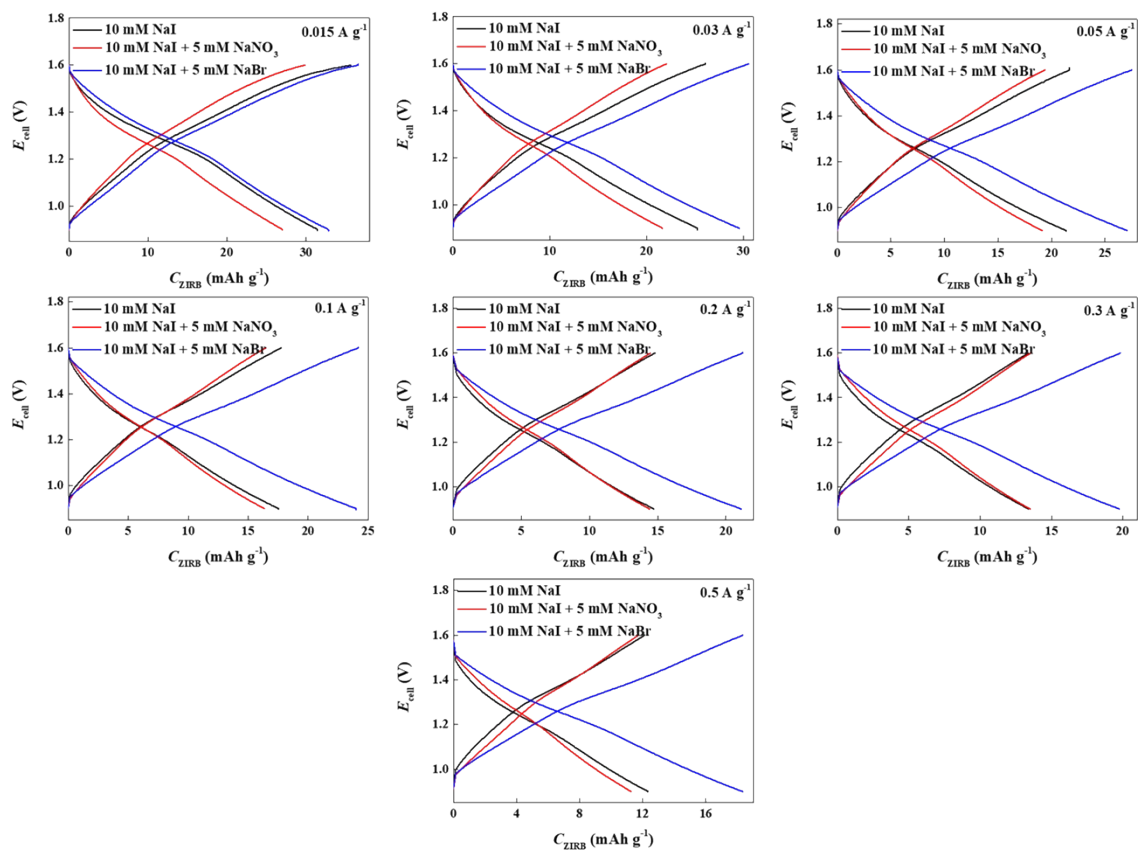

**Fig. S18**  $E_{\text{cell}}$  vs.  $C_{\text{ZIRB}}$  curves in model ZIRBs at various current densities from (-)Zn|0.2 M  $\text{ZnSO}_4(\text{aq}) + 10 \text{ mM NaI}(\text{aq})$  |micro-C(+) (black), (-)Zn|0.2 M  $\text{ZnSO}_4(\text{aq}) + 10 \text{ mM NaI}(\text{aq}) + 5 \text{ mM NaBr}(\text{aq})$  |micro-C(+) (blue), and (-)Zn|0.2 M  $\text{ZnSO}_4(\text{aq}) + 10 \text{ mM NaI}(\text{aq}) + 5 \text{ mM NaNO}_3(\text{aq})$  |micro-C(+) (red), respectively.



**Table S1.** Reactions and corresponding parameters for a simulation without Br<sup>-</sup>, with results displayed as simulated voltammograms and corresponding concentration profiles in Figure 2b-c and Figure S6a-b, respectively.

| Reactions                                                                                                                                                                                                                                                                         | Parameters                                                           |
|-----------------------------------------------------------------------------------------------------------------------------------------------------------------------------------------------------------------------------------------------------------------------------------|----------------------------------------------------------------------|
| $I \cdot + e^- \rightleftharpoons I(aq)$                                                                                                                                                                                                                                          | $E_{eq} = 0.3 \text{ V}$ , $k^0 = 0.1 \text{ cm/s}$ , $\alpha = 0.5$ |
| $2I \cdot \rightleftharpoons I_2(aq)$                                                                                                                                                                                                                                             | $K_{eq,(6)} = 200$                                                   |
| $I_2(aq) \rightleftharpoons I_2(I_2-F)$                                                                                                                                                                                                                                           | $K_{eq,(7)} = 1000$                                                  |
| $I(I_2-F) + I_2(I_2-F) \rightleftharpoons I_3^-(I_2-F)$                                                                                                                                                                                                                           | $K_{eq,(8)} = 724$                                                   |
| Relevant time-dependent diffusion equations                                                                                                                                                                                                                                       |                                                                      |
| (1) $\frac{\partial C_{I \cdot}}{\partial t} = D_{I \cdot} \left[ \frac{\partial^2 C_{I \cdot}}{\partial r^2} + \frac{2}{r} \frac{\partial C_{I \cdot}}{\partial r} \right] - 2k_{f,eq,(6)} C_{I \cdot}^2 + 2k_{b,eq,(6)} C_{I_2(aq)}$                                            |                                                                      |
| (2) $\frac{\partial C_{I^-(I_2-F)}}{\partial t} = D_{I^-(I_2-F)} \left[ \frac{\partial^2 C_{I^-(I_2-F)}}{\partial r^2} + \frac{2}{r} \frac{\partial C_{I^-(I_2-F)}}{\partial r} \right] - k_{f,eq,(8)} C_{I_2(I_2-F)} C_{I^-(I_2-F)} + k_{b,eq,(8)} C_{I_3^-(I_2-F)}$             |                                                                      |
| (3) $\frac{\partial C_{I_2(aq)}}{\partial t} = D_{I_2(aq)} \left[ \frac{\partial^2 C_{I_2(aq)}}{\partial r^2} + \frac{2}{r} \frac{\partial C_{I_2(aq)}}{\partial r} \right] + k_{f,eq,(6)} C_{I \cdot}^2 - k_{b,eq,(6)} C_{I_2(aq)}$                                              |                                                                      |
| (4) $\frac{\partial C_{I_2(I_2-F)}}{\partial t} = D_{I_2(I_2-F)} \left[ \frac{\partial^2 C_{I_2(I_2-F)}}{\partial r^2} + \frac{2}{r} \frac{\partial C_{I_2(I_2-F)}}{\partial r} \right] + k_{f,eq,(7)} C_{I_2(aq)} - k_{b,eq,(7)} C_{I_2(I_2-F)} + k_{b,eq,(8)} C_{I_3^-(I_2-F)}$ |                                                                      |
| (5) $\frac{\partial C_{I_3^-(I_2-F)}}{\partial t} = D_{I_3^-(I_2-F)} \left[ \frac{\partial^2 C_{I_3^-(I_2-F)}}{\partial r^2} + \frac{2}{r} \frac{\partial C_{I_3^-(I_2-F)}}{\partial r} \right] + k_{f,eq,(8)} C_{I_2(I_2-F)} C_{I^-(I_2-F)} - k_{b,eq,(8)} C_{I_3^-(I_2-F)}$     |                                                                      |
| Initial condition, completing the definition of the problem                                                                                                                                                                                                                       |                                                                      |
| $t = 0$ , $C_{I^-(I_2-F)} = C_{I_2(aq)} = C_{I_2(I_2-F)} = C_{I_3^-(I_2-F)} = 0$ , $C_{I \cdot} = 100 \text{ mM}$                                                                                                                                                                 |                                                                      |
| $D_{I \cdot} = D_{I^-(I_2-F)} = D_{I_3^-(I_2-F)} = 1.47 \times 10^{-5}$ , $D_{I_2(I_2-F)} = 1.72 \times 10^{-5}$                                                                                                                                                                  |                                                                      |
| $D_{I_2(aq)} = 3.00 \times 10^{-8} \text{ cm s}^{-1}$                                                                                                                                                                                                                             |                                                                      |



**Table S2.** Reactions and the Corresponding parameters for a simulation with Br<sup>-</sup>, with results displayed as simulated voltammograms and corresponding concentration profiles in Figure 2d-e and Figure S6c-d, respectively.

| Reactions                                                                                                                                                                                                                                                                                                                                                         | Parameters                                                     |
|-------------------------------------------------------------------------------------------------------------------------------------------------------------------------------------------------------------------------------------------------------------------------------------------------------------------------------------------------------------------|----------------------------------------------------------------|
| $I \cdot + e^- \rightleftharpoons I^-(aq)$                                                                                                                                                                                                                                                                                                                        | $E_{eq} = 0.3 \text{ V}, k^0 = 0.1 \text{ cm/s}, \alpha = 0.5$ |
| $2I \cdot \rightleftharpoons I_2(aq)$                                                                                                                                                                                                                                                                                                                             | $K_{eq,(6)} = 200$                                             |
| $I_2(aq) \rightleftharpoons I_2(I_2-F)$                                                                                                                                                                                                                                                                                                                           | $K_{eq,(7)} = 1000$                                            |
| $I_2(I_2-F) + I(I_2-F) \rightleftharpoons I_3^-(I_2-F)$                                                                                                                                                                                                                                                                                                           | $K_{eq,(8)} = 724$                                             |
| $I_2(I_2-F) + Br^-(I_2-F) \rightleftharpoons I_2Br^-(I_2-F)$                                                                                                                                                                                                                                                                                                      | $K_{eq,(9)} = 12$                                              |
| Relevant time-dependent diffusion equations                                                                                                                                                                                                                                                                                                                       |                                                                |
| (1) $\frac{\partial C_{I \cdot}}{\partial t} = D_{I \cdot} \left[ \frac{\partial^2 C_{I \cdot}}{\partial r^2} + \frac{2}{r} \frac{\partial C_{I \cdot}}{\partial r} \right] - 2k_{f,eq,(6)} C_{I \cdot}^2 + 2k_{b,eq,(6)} C_{I_2(aq)}$                                                                                                                            |                                                                |
| (2) $\frac{\partial C_{I^-(I_2-F)}}{\partial t} = D_{I^-(I_2-F)} \left[ \frac{\partial^2 C_{I^-(I_2-F)}}{\partial r^2} + \frac{2}{r} \frac{\partial C_{I^-(I_2-F)}}{\partial r} \right] - k_{f,eq,(8)} C_{I_2(I_2-F)} C_{I^-(I_2-F)} + k_{b,eq,(8)} C_{I_3^-(I_2-F)}$                                                                                             |                                                                |
| (3) $\frac{\partial C_{I_2(aq)}}{\partial t} = D_{I_2(aq)} \left[ \frac{\partial^2 C_{I_2(aq)}}{\partial r^2} + \frac{2}{r} \frac{\partial C_{I_2(aq)}}{\partial r} \right] + k_{f,eq,(6)} C_{I \cdot}^2 - k_{b,eq,(6)} C_{I_2(aq)}$                                                                                                                              |                                                                |
| (4) $\frac{\partial C_{I_2(I_2-F)}}{\partial t} = D_{I_2(I_2-F)} \left[ \frac{\partial^2 C_{I_2(I_2-F)}}{\partial r^2} + \frac{2}{r} \frac{\partial C_{I_2(I_2-F)}}{\partial r} \right] + k_{f,eq,(7)} C_{I_2(aq)} - k_{b,eq,(7)} C_{I_2(I_2-F)} + k_{b,eq,(8)} C_{I_3^-(I_2-F)} - k_{f,eq,(9)} C_{I_2(I_2-F)} C_{Br^-(I_2-F)} + k_{b,eq,(9)} C_{I_2Br^-(I_2-F)}$ |                                                                |
| (5) $\frac{\partial C_{I_3^-(I_2-F)}}{\partial t} = D_{I_3^-(I_2-F)} \left[ \frac{\partial^2 C_{I_3^-(I_2-F)}}{\partial r^2} + \frac{2}{r} \frac{\partial C_{I_3^-(I_2-F)}}{\partial r} \right] + k_{f,eq,(8)} C_{I_2(I_2-F)} C_{I^-(I_2-F)} - k_{b,eq,(8)} C_{I_3^-(I_2-F)}$                                                                                     |                                                                |
| (6) $\frac{\partial C_{Br^-(I_2-F)}}{\partial t} = D_{Br^-(I_2-F)} \left[ \frac{\partial^2 C_{Br^-(I_2-F)}}{\partial r^2} + \frac{2}{r} \frac{\partial C_{Br^-(I_2-F)}}{\partial r} \right] - k_{f,eq,(9)} C_{I_2(I_2-F)}$                                                                                                                                        |                                                                |

---


$$(7) \frac{\partial C_{I_2Br^-(I_2-F)}}{\partial t} = D_{I_2Br^-(I_2-F)} \left[ \frac{\partial^2 C_{I_2Br^-(I_2-F)}}{\partial r^2} + \frac{2}{r} \frac{\partial C_{I_2Br^-(I_2-F)}}{\partial r} \right] + k_{f,eq,(9)} C_{I_2(I_2-F)} C_{Br^-(I_2-F)} - k_{b,eq,(9)} C_{I_2Br^-(I_2-F)}$$


---

Initial condition, completing the definition of the problem

---

$$t = 0, C_{I^-(I_2-F)} = C_{I_2(aq)} = C_{I_2(I_2-F)} = C_{I_3^-(I_2-F)} = C_{I_2Br^-(I_2-F)} = 0, C_{I^{\cdot}} = 100 \text{ mM},$$

$$C_{Br^-(I_2-F)} = \frac{1}{2} C_{I^{\cdot}}, D_{I^{\cdot}} = D_{I^-(I_2-F)} = D_{I_3^-(I_2-F)} = D_{I_2Br^-(I_2-F)} = 1.47 \times 10^{-5},$$

$$D_{I_2(aq)} = 1.72 \times 10^{-5}, D_{I_2(I_2-F)} = 3.00 \times 10^{-8}, D_{Br^-(I_2-F)} = 1.35 \times 10^{-5} \text{ cm s}^{-1}$$


---

**Table S3.** ED at a specific PD from the electrochemical capacitors operated in an aqueous solution with various redox active species.

| <b>Redox active species in ECs<br/>(Abbreviation if necessary)</b> | <b>Energy density (ED)<br/>at power density (PD)</b>                                                               | <b>No. of Ref.<br/>in the<br/>article</b> |
|--------------------------------------------------------------------|--------------------------------------------------------------------------------------------------------------------|-------------------------------------------|
| <b>NaI + NaBr</b>                                                  | <b>26.2 Wh kg<sup>-1</sup> at 327.1 W kg<sup>-1</sup>,<br/>15.9 Wh kg<sup>-1</sup> at 6513.6 W kg<sup>-1</sup></b> | <b>This work</b>                          |
| KSeCN                                                              | 11.7 Wh kg <sup>-1</sup> at 368.2 W kg <sup>-1</sup> ,<br>3.6 Wh kg <sup>-1</sup> at 3327 W kg <sup>-1</sup>       | [48]                                      |
| H <sub>3</sub> PW <sub>12</sub> O <sub>40</sub>                    | 1.6 Wh kg <sup>-1</sup> at 98.4 W kg <sup>-1</sup>                                                                 | [49]                                      |
| Hydroquinone (HQ)                                                  | 2.5 Wh kg <sup>-1</sup> at 99.4 W kg <sup>-1</sup>                                                                 | [49]                                      |
| 2, 6-Dihydroxyanthraquinone<br>(2, 6-DHAQ)                         | 8.9 Wh kg <sup>-1</sup> at 119 W kg <sup>-1</sup>                                                                  | [50]                                      |
| K <sub>3</sub> [Fe(CN) <sub>6</sub> ]                              | 11.8 Wh kg <sup>-1</sup> at 188 W kg <sup>-1</sup>                                                                 | [50]                                      |
| K <sub>3</sub> [Fe(CN) <sub>6</sub> ]                              | 36.9 Wh kg <sup>-1</sup> at 225 W kg <sup>-1</sup>                                                                 | [51]                                      |
| Dihydroxyanthraquinone+hydroquinone<br>(DHAQ + HQ)                 | 21.1 Wh kg <sup>-1</sup> at 500 W kg <sup>-1</sup>                                                                 | [52]                                      |
| KI                                                                 | 11.56 Wh kg <sup>-1</sup> at 1000 W kg <sup>-1</sup>                                                               | [53]                                      |
| Anthraquinone-2-sulfonic acid sodium<br>(AQS)                      | 19.35 Wh kg <sup>-1</sup> at 1000 W kg <sup>-1</sup>                                                               | [53]                                      |

## Abbreviations

Aqua-ESSs: aqueous energy storage systems

ZPI-RFB: Zn-polyiodide redox flow battery

ZIRB: Zn-iodine rechargeable battery

I-EC: Iodide redox electrolyte electrochemical capacitor

PG: pyrolytic graphite

micro-c: microporous carbon

I<sub>2</sub>-F: Iodine-Film

$\eta$ : overpotential

$E_{eq}$ : equilibrium potential

$K_{stab}$ : stability constant

$K_{eq}$ : equilibrium constant

$E^\circ$ : standard reduction potential

$C$ : concentration

$R$ : gas constant

$T$ : absolute temperature

$F$ : Faraday constant

$n_{e^-}$ : number of electrons

$Q_{ox \text{ or Red}}$ : quantitative charge from the voltammetric oxidation and reduction peaks

$E_+$ : half-potential of a positive electrode

$E_-$ : half-potential of a negative electrode

$E_{cell}$ : cell potential

$E_{oc}$ : open-circuit potential

$SC_{cell}$ : specific cell capacitance

$C_{ZIRB}$ : specific capacity of ZIRB

ED: energy density

PD: power density

## References

- [1] H. Wang, H. Yi, C. Zhu, X. Wang, H. Jin Fan, *Nano Energy* 2015, **13**, 658-669.
- [2] M. Meller, J. Menzel, K. Fic, D. Gastol, E. Frackowiak, *Solid State Ionics* 2014, **265**, 61-67.
